# Supplementary material for: The disease burden and quality of life of chronic cough patients in South Korea and Taiwan
Source: PubMed Central journal article supplement — World Allergy Organ J. 2022 Sep 5;15(9):100681. doi: 10.1016/j.waojou.2022.100681 (PMC9463600; doi:10.1016/j.waojou.2022.100681), 2022-09-05
Supplement: mmc1.pdf [file mmc1.pdf]

**Supplemental Table 1. Demographics and health characteristics of matched non-CC controls (1:3) and CC patients in South Korea and Taiwan**

|                                    |                                       | South Korea               |       |                        |       |                                        | Taiwan                    |       |                        |       |                                        |
|------------------------------------|---------------------------------------|---------------------------|-------|------------------------|-------|----------------------------------------|---------------------------|-------|------------------------|-------|----------------------------------------|
|                                    |                                       | Matched non-CC<br>(N=303) |       | CC patients<br>(N=101) |       | Matched<br>non-CC vs.<br>CC<br>P-value | Matched non-CC<br>(N=777) |       | CC patients<br>(N=259) |       | Matched<br>non-CC vs.<br>CC<br>P-value |
|                                    |                                       | Mean                      | SD    | Mean                   | SD    |                                        | Mean                      | SD    | Mean                   | SD    |                                        |
|                                    |                                       | %                         | Count | %                      | Count | P-value                                | %                         | Count | %                      | Count | P-value                                |
| Age                                |                                       | 43.80                     | 13.08 | 43.93                  | 13.99 | 0.930                                  | 48.47                     | 14.00 | 48.69                  | 14.35 | 0.821                                  |
| Charlson Comorbidity index         |                                       | 0.20                      | 0.61  | 0.42                   | 0.86  | 0.007                                  | 0.38                      | 0.79  | 0.52                   | 0.77  | 0.012                                  |
| Adapted Charlson Comorbidity index |                                       | 0.18                      | 0.60  | 0.31                   | 0.78  | 0.093                                  | 0.36                      | 0.76  | 0.39                   | 0.70  | 0.615                                  |
| Gender                             | <i>Male</i>                           | 40.9%                     | 124   | 44.6%                  | 45    | 0.522                                  | 55.6%                     | 432   | 54.8%                  | 142   | 0.829                                  |
|                                    | <i>Female</i>                         | 59.1%                     | 179   | 55.4%                  | 56    |                                        | 44.4%                     | 345   | 45.2%                  | 117   |                                        |
| Currently employed                 | <i>No</i>                             | 25.1%                     | 76    | 25.7%                  | 26    | 0.895                                  | 24.5%                     | 190   | 24.3%                  | 63    | 0.967                                  |
|                                    | <i>Yes</i>                            | 74.9%                     | 227   | 74.3%                  | 75    |                                        | 75.5%                     | 587   | 75.7%                  | 196   |                                        |
| Level of education                 | <i>University degree</i>              | 61.7%                     | 187   | 62.4%                  | 63    | 0.906                                  | 60.1%                     | 467   | 58.3%                  | 151   | 0.609                                  |
|                                    | <i>Not/Decline to answer</i>          | 38.3%                     | 116   | 37.6%                  | 38    |                                        | 39.9%                     | 310   | 41.7%                  | 108   |                                        |
| BMI category                       | <i>Underweight (BMI&lt;18.5)</i>      | 3.6%                      | 11    | 5.9%                   | 6     | 0.725                                  | 2.2%                      | 17    | 3.1%                   | 8     | 0.904                                  |
|                                    | <i>Normal weight (18.5≤BMI&lt;23)</i> | 48.5%                     | 147   | 49.5%                  | 50    |                                        | 36.7%                     | 285   | 37.1%                  | 96    |                                        |
|                                    | <i>Overweight (23≤BMI&lt;25)</i>      | 17.2%                     | 52    | 16.8%                  | 17    |                                        | 21.0%                     | 163   | 22.0%                  | 57    |                                        |

|                                   |                                       |       |     |       |    |       |       |     |       |     |       |
|-----------------------------------|---------------------------------------|-------|-----|-------|----|-------|-------|-----|-------|-----|-------|
|                                   | <i>Obese (BMI<math>\geq</math>25)</i> | 23.8% | 72  | 23.8% | 24 |       | 37.5% | 291 | 35.1% | 91  |       |
|                                   | <i>Decline to answer</i>              | 6.9%  | 21  | 4.0%  | 4  |       | 2.7%  | 21  | 2.7%  | 7   |       |
| Smoking status                    | <i>Never</i>                          | 56.8% | 172 | 53.5% | 54 | 0.615 | 70.3% | 546 | 69.9% | 181 | 0.987 |
|                                   | <i>Former</i>                         | 11.2% | 34  | 14.9% | 15 |       | 12.7% | 99  | 13.1% | 34  |       |
|                                   | <i>Current</i>                        | 32.0% | 97  | 31.7% | 32 |       | 17.0% | 132 | 17.0% | 44  |       |
| Use of alcohol                    | <i>Abstain</i>                        | 29.0% | 88  | 27.7% | 28 | 0.800 | 50.1% | 389 | 50.6% | 131 | 0.886 |
|                                   | <i>Currently consume alcohol</i>      | 71.0% | 215 | 72.3% | 73 |       | 49.9% | 388 | 49.4% | 128 |       |
| Vigorous exercise in past 30 days | <i>No</i>                             | 44.2% | 134 | 42.6% | 43 | 0.772 | 36.4% | 283 | 37.1% | 96  | 0.852 |
|                                   | <i>Yes</i>                            | 55.8% | 169 | 57.4% | 58 |       | 63.6% | 494 | 62.9% | 163 |       |

*BMI, body mass index; CC, chronic cough; SD, standard deviation*
